# Supplementary material for: KBi(IO3)3(OH) and NaBi(IO3)4: from the centrosymmetric chain to a noncentrosymmetric double layer
Source: Royal Society of Chemistry journal article supplement (doi:10.1039/c9dt01573f), 2019-01-01
Supplement: c9dt01573f1.pdf [file c9dt01573f1.pdf]

## Supporting information

### **KBi(IO<sub>3</sub>)<sub>3</sub>(OH) and NaBi(IO<sub>3</sub>)<sub>4</sub>: From Centrosymmetric Chain to Noncentrosymmetric Double Layer**

*Ying-Jie Jia,<sup>a</sup> Yi-Gang Chen,<sup>\* a</sup> Ting Wang,<sup>a</sup> Yao Guo,<sup>\* b</sup> Xiao-Fang Guan,<sup>a</sup> Xian-Ming Zhang<sup>\*a</sup>*

<sup>a</sup>Key Laboratory of Magnetic Molecules and Magnetic Information Material of Ministry of Education, School of Chemistry and Material Science, Shanxi Normal University, Linfen 041004, China

<sup>b</sup>Department of Chemical and Environmental Engineering, Anyang Institute of Technology, Anyang 455000, China

**Table S1.** Crystal data and structure refinement for  $\text{NaBi}(\text{IO}_3)_4$  and  $\text{KBi}(\text{IO}_3)_3(\text{OH})$ .

**Table S2.** Selected bond distances ( $\text{\AA}$ ) for  $\text{KBi}(\text{IO}_3)_3(\text{OH})$  and  $\text{NaBi}(\text{IO}_3)_4$ .

**Table S3.** Energy-Dispersive Spectrometry (EDS) for  $\text{KBi}(\text{IO}_3)_3(\text{OH})$  and  $\text{NaBi}(\text{IO}_3)_4$ .

**Table S4.** Dipole moments of  $\text{IO}_3$  groups  $\text{BiO}_n$  ( $n = 7, 8$ ) polyhedra for  $\text{KBi}(\text{IO}_3)_3(\text{OH})$  and  $\text{NaBi}(\text{IO}_3)_4$ .

**Table S5.** Calculation of dipole moment for  $\text{NaM}(\text{IO}_3)_4$  ( $M = \text{Ce}, \text{Sm}, \text{La}, \text{Eu}, \text{Bi}, \text{Y}$ ).

**Fig. S1.** Morphology for  $\text{KBi}(\text{IO}_3)_3(\text{OH})$  and  $\text{NaBi}(\text{IO}_3)_4$ .

**Fig. S2.** Energy-Dispersive Spectrometry (EDS) plot of  $\text{KBi}(\text{IO}_3)_3(\text{OH})$  and  $\text{NaBi}(\text{IO}_3)_4$ .

**Fig. S3.** Experimental and simulated PXRD patterns of  $\text{KBi}(\text{IO}_3)_3(\text{OH})$  and  $\text{NaBi}(\text{IO}_3)_4$ .

**Fig. S4.** (a) Coordinate environments of the  $\text{K}^+$  in  $\text{KBi}(\text{IO}_3)_3(\text{OH})$ .

**Fig. S5.** Asymmetric unit of  $\text{NaBi}(\text{IO}_3)_4$ .

**Fig. S6.** Structure of  $\text{NaBi}(\text{IO}_3)_4$  along the  $b$ -axis.

**Fig. S7.** TGA and DSC curves of  $\text{KBi}(\text{IO}_3)_3(\text{OH})$  and  $\text{NaBi}(\text{IO}_3)_4$ .

**Fig. S8.** PXRD patterns for the residual of  $\text{KBi}(\text{IO}_3)_3(\text{OH})$  and  $\text{NaBi}(\text{IO}_3)_4$ .

**Fig. S9.** IR spectrum of  $\text{KBi}(\text{IO}_3)_3(\text{OH})$  and  $\text{NaBi}(\text{IO}_3)_4$ .

**Fig. S10.** UV-vis diffuse spectra of  $\text{KBi}(\text{IO}_3)_3(\text{OH})$  and  $\text{NaBi}(\text{IO}_3)_4$ .

**Fig. S11.** Calculated band structures of (a)  $\text{KBi}(\text{IO}_3)_3(\text{OH})$  and  $\text{NaBi}(\text{IO}_3)_4$ .

**Fig. S12.** Calculated refractive indices and birefringence of  $\text{NaBi}(\text{IO}_3)_4$ .

**Table S1.** Crystal data and structure refinement for NaBi(IO<sub>3</sub>)<sub>4</sub> and KBi(IO<sub>3</sub>)<sub>3</sub>(OH).

|                                                                                          |                                         |                                     |
|------------------------------------------------------------------------------------------|-----------------------------------------|-------------------------------------|
| Empirical formula                                                                        | KBi(IO <sub>3</sub> ) <sub>3</sub> (OH) | NaBi(IO <sub>3</sub> ) <sub>4</sub> |
| Formula weight                                                                           | 789.28                                  | 931.57                              |
| Crystal system                                                                           | triclinic                               | monoclinic                          |
| Space group                                                                              | <i>P</i> -1                             | <i>Cc</i>                           |
| <i>a</i> /Å                                                                              | 7.2662(4)                               | 31.5437(19)                         |
| <i>b</i> /Å                                                                              | 8.1678(5)                               | 5.6122(3)                           |
| <i>c</i> /Å                                                                              | 8.8629(5)                               | 12.7289(8)                          |
| <i>α</i> /°                                                                              | 101.6212(10)                            | 90                                  |
| <i>β</i> /°                                                                              | 93.8011(11)                             | 90.7346(12)                         |
| <i>γ</i> /°                                                                              | 109.3178(10)                            | 90                                  |
| Volume/Å <sup>3</sup>                                                                    | 481.16(5)                               | 2253.2(2)                           |
| <i>Z</i>                                                                                 | 2                                       | 8                                   |
| $\rho_{\text{calc}}$ g/cm <sup>3</sup>                                                   | 5.448                                   | 5.492                               |
| $\mu$ /mm <sup>-1</sup>                                                                  | 28.417                                  | 26.709                              |
| <i>F</i> (000)                                                                           | 683.0                                   | 3216.0                              |
| Crystal size/mm <sup>3</sup>                                                             | 0.25×0.21×0.15                          | 0.3×0.15×0.08                       |
| Goodness-of-fit on <i>F</i> <sup>2</sup>                                                 | 1.180                                   | 1.074                               |
| <i>R</i> <sub>1</sub> , <i>wR</i> <sub>2</sub> [ <i>I</i> >=2σ( <i>I</i> )] <sup>a</sup> | 0.0170, 0.0488                          | 0.0412, 0.0960                      |
| all data [ <i>I</i> >=2σ( <i>I</i> )] <sup>a</sup>                                       | 0.0171, 0.0489                          | 0.0412, 0.0960                      |
| Flack parameter                                                                          | —                                       | 0.4248(14)                          |

<sup>a</sup> $R_1 = \sum ||F_o| - |F_c|| / \sum |F_o|$ .  $wR_2 = [\sum (F_o^2 - F_c^2)^2 / \sum (F_o^2)^2]^{1/2}$ .

**Table S2.** Selected bond distances (Å) and angles (°) for  $\text{KBi}(\text{IO}_3)_3(\text{OH})$  and  $\text{NaBi}(\text{IO}_3)_4$ .

**$\text{KBi}(\text{IO}_3)_3(\text{OH})$**

|                  |            |                  |           |
|------------------|------------|------------------|-----------|
| Bi(1)-O(10)      | 2.137(3)   | I(2)-O(9)#2      | 1.828(4)  |
| Bi(1)-O(9)       | 2.338(4)   | I(3)-O(8)        | 1.793(4)  |
| Bi(1)-O(1)#1     | 2.351(4)   | I(3)-O(7)        | 1.820(4)  |
| Bi(1)-O(6)       | 2.354(4)   | I(3)-O(6)        | 1.831(4)  |
| Bi(1)-O(3)       | 2.413(4)   | K(1)-O(10)#3     | 2.719(3)  |
| Bi(1)-O(8)#2     | 2.457(4)   | K(1)-O(1)#7      | 2.758(4)  |
| Bi(1)-O(4)       | 2.665(4)   | K(1)-O(7)#8      | 2.820(4)  |
| I(1)-O(3)        | 1.828(4)   | K(1)-O(8)#8      | 2.951(5)  |
| I(1)-O(1)        | 1.830(4)   | K(1)-O(2)#5      | 2.958(4)  |
| I(1)-O(2)        | 1.790(4)   | K(1)-O(1)#1      | 3.032(4)  |
| I(2)-O(4)        | 1.805(4)   | K(1)-O(4)#1      | 3.051(4)  |
| I(2)-O(5)        | 1.805(4)   | K(1)-O(9)#3      | 3.089(4)  |
| O(2)-I(1)-O(3)   | 102.15(19) | O(5)-I(2)-O(9)#2 | 99.25(18) |
| O(2)-I(1)-O(1)   | 101.27(18) | O(8)-I(3)-O(7)   | 96.59(19) |
| O(3)-I(1)-O(1)   | 96.23(18)  | O(8)-I(3)-O(6)   | 95.57(19) |
| O(4)-I(2)-O(5)   | 100.99(19) | O(7)-I(3)-O(6)   | 96.62(18) |
| O(4)-I(2)-O(9)#2 | 101.45(19) |                  |           |

Symmetry codes:

#1 -x+1, -y, -z      #2 -x+1, -y, -z+1      #3 -x, -y, -z      #4 x, y, z+1  
 #5 -x+1, -y+1, -z      #6 x+1, y, z      #7 x-1, y, z      #8 x, y, z-1

**NaBi(IO<sub>3</sub>)<sub>4</sub>**

|               |          |               |          |
|---------------|----------|---------------|----------|
| Bi(1)-O(9)#1  | 2.365(5) | Na(2)-O(24)#5 | 2.539(6) |
| Bi(1)-O(8)#2  | 2.388(5) | Na(2)-O(4)#6  | 2.609(6) |
| Bi(1)-O(10)#3 | 2.395(5) | Na(2)-O(13)#5 | 2.904(6) |
| Bi(1)-O(5)    | 2.411(5) | I(1)-O(2)     | 1.799(5) |
| Bi(1)-O(3)    | 2.449(5) | I(1)-O(1)     | 1.804(5) |
| Bi(1)-O(12)#3 | 2.470(5) | I(1)-O(3)     | 1.825(5) |
| Bi(1)-O(6)    | 2.552(5) | I(2)-O(6)     | 1.812(5) |
| Bi(1)-O(4)    | 2.660(5) | I(2)-O(7)     | 1.813(5) |
| Bi(2)-O(15)#2 | 2.319(5) | I(2)-O(8)     | 1.839(5) |
| Bi(2)-O(17)   | 2.350(5) | I(3)-O(9)     | 1.791(5) |
| Bi(2)-O(24)#4 | 2.427(5) | I(3)-O(5)     | 1.813(5) |
| Bi(2)-O(19)   | 2.429(5) | I(3)-O(10)    | 1.826(5) |
| Bi(2)-O(18)   | 2.498(5) | I(4)-O(11)    | 1.780(5) |
| Bi(2)-O(21)#5 | 2.512(5) | I(4)-O(13)    | 1.798(5) |
| Bi(2)-O(14)#3 | 2.523(5) | I(4)-O(4)     | 1.830(5) |
| Bi(2)-O(16)   | 2.549(5) | I(5)-O(24)    | 1.808(5) |
| Na(1)-O(11)   | 2.480(7) | I(5)-O(12)    | 1.819(5) |
| Na(1)-O(13)   | 2.673(6) | I(5)-O(14)    | 1.822(5) |
| Na(1)-O(14)   | 2.496(6) | I(6)-O(17)#6  | 1.805(5) |
| Na(1)-O(16)   | 2.811(7) | I(6)-O(15)    | 1.820(5) |
| Na(1)-O(24)   | 2.836(6) | I(6)-O(16)    | 1.825(5) |

|                  |          |                    |          |
|------------------|----------|--------------------|----------|
| Na(1)-O(15)#2    | 2.374(6) | I(7)-O(23)         | 1.785(5) |
| Na(1)-O(21)#8    | 2.609(6) | I(7)-O(22)         | 1.804(5) |
| Na(1)-O(17)#8    | 2.744(6) | I(7)-O(18)         | 1.809(5) |
| Na(2)-O(10)      | 2.518(6) | I(8)-O(20)         | 1.802(5) |
| Na(2)-O(11)      | 2.355(6) | I(8)-O(21)         | 1.818(5) |
| Na(2)-O(14)      | 2.463(6) | I(8)-O(19)         | 1.823(5) |
| Na(2)-O(12)#5    | 2.516(5) |                    |          |
| O(2)-I(1)-O(1)   | 101.3(2) | O(24)-I(5)-O(12)   | 91.9(2)  |
| O(2)-I(1)-O(3)   | 97.2(2)  | O(24)-I(5)-O(14)   | 95.8(2)  |
| O(1)-I(1)-O(3)   | 98.2(2)  | O(12)-I(5)-O(14)   | 99.0(2)  |
| O(6)-I(2)-O(7)   | 100.3(2) | O(17)#6-I(6)-O(15) | 90.2(2)  |
| O(6)-I(2)-O(8)   | 98.5(3)  | O(17)#6-I(6)-O(16) | 96.5(2)  |
| O(7)-I(2)-O(8)   | 96.5(2)  | O(15)-I(6)-O(16)   | 99.3(2)  |
| O(9)-I(3)-O(5)   | 93.0(2)  | O(23)-I(7)-O(22)   | 101.7(2) |
| O(9)-I(3)-O(10)  | 96.6(2)  | O(23)-I(7)-O(18)   | 98.7(3)  |
| O(5)-I(3)-O(10)  | 97.0(2)  | O(22)-I(7)-O(18)   | 96.6(3)  |
| O(11)-I(4)-O(13) | 95.6(3)  | O(20)-I(8)-O(21)   | 97.6(2)  |
| O(11)-I(4)-O(4)  | 97.9(3)  | O(20)-I(8)-O(19)   | 99.2(2)  |
| O(13)-I(4)-O(4)  | 102.4(2) | O(21)-I(8)-O(19)   | 97.4(2)  |

Symmetry codes:

#1 x, -y-2, z+1/2    #2 x, y+1, z    #3 x, -y-1, z+1/2  
#4 x, -y, z+1/2    #5 x, y-1, z    #6 x, -y-1, z-1/2  
#7 x, -y-2, z-1/2    #8 x, -y, z-1/2

**Table S3.** Energy-Dispersive Spectrometry (EDS) for  $\text{KBi}(\text{IO}_3)_3(\text{OH})$  and  $\text{NaBi}(\text{IO}_3)_4$ .

**$\text{KBi}(\text{IO}_3)_3(\text{OH})$**

| Point 1 |        |        |         | Point 2                                                         |        |        |        |
|---------|--------|--------|---------|-----------------------------------------------------------------|--------|--------|--------|
| Element | Weight | Atomic | Formula | Element                                                         | Weight | Atomic | Formul |
| O K     | 19.08  | 65.05  |         | O K                                                             | 15.71  | 59.52  |        |
| K K     | 4.82   | 6.73   | 1.0     | K K                                                             | 5.06   | 7.84   | 1.0    |
| I L     | 49.43  | 21.25  | 3.16    | I L                                                             | 51.53  | 24.61  | 3.14   |
| Bi M    | 26.67  | 6.96   | 1.03    | Bi M                                                            | 27.69  | 8.03   | 1.02   |
| Totals  | 100    |        |         | Totals                                                          | 100    |        |        |
| Point 3 |        |        |         | Average ratio:<br>$\text{K}_{1.0}\text{Bi}_{1.0}\text{I}_{3.1}$ |        |        |        |
| Element | Weight | Atomic | Formula |                                                                 |        |        |        |
| O K     | 20.56  | 67.09  |         |                                                                 |        |        |        |
| K K     | 4.83   | 6.45   | 1.0     |                                                                 |        |        |        |
| I L     | 48.41  | 19.92  | 3.09    |                                                                 |        |        |        |
| Bi M    | 26.21  | 6.55   | 1.02    |                                                                 |        |        |        |
| Totals  | 100    |        |         |                                                                 |        |        |        |



**NaBi(IO<sub>3</sub>)<sub>4</sub>**

| Point 1 |        |        |         | Point 2 |        |        |         |
|---------|--------|--------|---------|---------|--------|--------|---------|
| Element | Weight | Atomic | Formula | Element | Weight | Atomic | Formula |
| O K     | 22.23  | 69.28  |         | O K     | 20.59  | 66.93  |         |
| Na K    | 2.01   | 4.96   | 1.0     | Na K    | 2.14   | 4.83   | 1.0     |
| I L     | 53.74  | 21.11  | 4.26    | I L     | 56.04  | 20.96  | 4.34    |
| Bi M    | 22.03  | 5.26   | 1.06    | Bi M    | 21.23  | 5.28   | 1.09    |
| Totals  | 100    |        |         | Totals  | 100    |        |         |

  

| Point 3 |        |        |         |
|---------|--------|--------|---------|
| Element | Weight | Atomic | Formula |
| O K     | 21.28  | 67.38  |         |
| Na K    | 2.48   | 5.47   | 1.0     |
| I L     | 55.36  | 22.10  | 4.04    |
| Bi M    | 20.88  | 5.06   | 0.93    |
| Totals  | 100    |        |         |

Average ratio:  
 $\text{Na}_{1.0}\text{Bi}_{1.03}\text{I}_{4.2}$

**Table S4.** Dipole moments of IO<sub>3</sub> groups BiO<sub>n</sub> (n = 7, 8) polyhedra units for KBi(IO<sub>3</sub>)<sub>3</sub>(OH) and NaBi(IO<sub>3</sub>)<sub>4</sub>.

**KBi(IO<sub>3</sub>)<sub>3</sub>(OH)**

| Species   | x-component | y-component | z -component | total magnitude                         | debye    |
|-----------|-------------|-------------|--------------|-----------------------------------------|----------|
|           |             |             |              | $\times 10^{-18}$ esu·cm/Å <sup>3</sup> |          |
| I(1)O3    | 9.0659      | 7.6012      | 11.4177      | 13.2684                                 |          |
|           | 9.0659      | -7.6012     | -11.4177     | 13.2684                                 |          |
|           | <b>0</b>    | <b>0</b>    | <b>0</b>     | <b>0</b>                                | <b>0</b> |
| I(2)O3    | -13.1435    | -6.6366     | 3.7756       | 13.7845                                 |          |
|           | 13.1435     | 6.6366      | -3.7756      | 13.7845                                 |          |
|           | <b>0</b>    | <b>0</b>    | <b>0</b>     | <b>0</b>                                | <b>0</b> |
| BiO7      | -5.8118     | 3.0999      | -3.1368      | 8.1638                                  |          |
|           | 5.8118      | -3.0999     | 3.1368       | 8.1638                                  |          |
|           | <b>0</b>    | <b>0</b>    | <b>0</b>     | <b>0</b>                                | <b>0</b> |
| Unit cell |             | <b>0</b>    | <b>0</b>     | <b>0</b>                                | <b>0</b> |

**NaBi(IO<sub>3</sub>)<sub>4</sub>**

| Species | x-<br>component | y-<br>component | z -component    | total magnitude<br>debye <span style="float: right;">×10<sup>-18</sup></span> |               |
|---------|-----------------|-----------------|-----------------|-------------------------------------------------------------------------------|---------------|
| I(1)O3  | -0.5591         | 14.3608         | 0.6727          | 14.3877                                                                       |               |
|         | -0.5591         | 14.3608         | 0.6727          | 14.3877                                                                       |               |
|         | -0.5591         | -14.3608        | 0.6727          | 14.3877                                                                       |               |
|         | -0.5591         | -14.3608        | 0.6727          | 14.3877                                                                       |               |
|         | <b>-2.2364</b>  | <b>0</b>        | <b>2.6908</b>   | <b>3.4988</b>                                                                 | <b>0.0016</b> |
| I(2)O3  | -12.4146        | 6.3674          | -4.5046         | 14.6614                                                                       |               |
|         | -12.4146        | 6.3674          | -4.5046         | 14.6614                                                                       |               |
|         | -12.4146        | -6.3674         | -4.5046         | 14.6614                                                                       |               |
|         | -12.4146        | -6.3674         | -4.5046         | 14.6614                                                                       |               |
|         | <b>-49.6584</b> | <b>0</b>        | <b>-18.0184</b> | <b>52.8263</b>                                                                | <b>0.0234</b> |
| I(3)O3  | -15.5891        | 5.5097          | -0.7776         | 16.5430                                                                       |               |
|         | -15.5891        | -5.5097         | -0.7776         | 16.5430                                                                       |               |
|         | -15.5891        | 5.5097          | -0.7776         | 16.5430                                                                       |               |
|         | -15.5891        | -5.5097         | -0.7776         | 16.5430                                                                       |               |
|         | <b>-62.3564</b> | <b>0</b>        | <b>-3.1104</b>  | <b>62.434</b>                                                                 | <b>0.0277</b> |
| I(4)O3  | -13.2951        | 4.0339          | 5.5183          | 15.0121                                                                       |               |
|         | -13.2951        | -4.0339         | 5.5183          | 15.0121                                                                       |               |
|         | -13.2951        | -4.0339         | 5.5183          | 15.0121                                                                       |               |
|         | -13.2951        | 4.0339          | 5.5183          | 15.0121                                                                       |               |
|         | <b>-53.1804</b> | <b>0</b>        | <b>22.0732</b>  | <b>57.5793</b>                                                                | <b>0.0256</b> |
| I(5)O3  | -0.6315         | -4.2770         | 15.4451         | 16.0466                                                                       |               |
|         | -0.6315         | 4.2770          | 15.4451         | 16.0466                                                                       |               |
|         | -0.6315         | 4.2770          | 15.4451         | 16.0466                                                                       |               |
|         | -0.6315         | -4.2770         | 15.4451         | 16.0466                                                                       |               |

|           |                 |          |                |                 |               |
|-----------|-----------------|----------|----------------|-----------------|---------------|
|           | <b>-2.5260</b>  | <b>0</b> | <b>61.7804</b> | <b>61.8320</b>  | <b>0.0274</b> |
| I(6)O3    | 15.3016         | -6.0531  | -0.5152        | 16.4695         |               |
|           | 15.3016         | 6.0531   | -0.5152        | 16.4695         |               |
|           | 15.3016         | -6.0531  | -0.5152        | 16.4695         |               |
|           | 15.3016         | 6.0531   | -0.5152        | 16.4695         |               |
| I(7)O3    | <b>61.2064</b>  | <b>0</b> | <b>-2.0608</b> | <b>61.2411</b>  | <b>0.0272</b> |
|           | 2.7175          | 14.1671  | 2.5253         | 14.6387         |               |
|           | 2.7175          | 14.1671  | 2.5253         | 14.6387         |               |
|           | 2.7175          | -14.1671 | 2.5253         | 14.6387         |               |
|           | 2.7175          | -14.1671 | 2.5253         | 14.6387         |               |
|           | <b>10.8700</b>  | <b>0</b> | <b>10.1012</b> | <b>14.8388</b>  | <b>0.0066</b> |
| I(8)O3    | 12.8470         | 6.5269   | 2.4567         | 14.5902         |               |
|           | 12.8470         | 6.5269   | 2.4567         | 14.5902         |               |
|           | 12.8470         | -6.5269  | 2.4567         | 14.5902         |               |
|           | 12.8470         | -6.5269  | 2.4567         | 14.5902         |               |
|           | <b>51.3880</b>  | <b>0</b> | <b>9.8268</b>  | <b>52.3191</b>  | <b>0.0232</b> |
| Bi(1)O8   | -0.8130         | 1.3457   | 1.7533         | 2.3627          |               |
|           | -0.8130         | -1.3457  | 1.7533         | 2.3627          |               |
|           | -0.8130         | 1.3457   | 1.7533         | 2.3627          |               |
|           | -0.8130         | -1.3457  | 1.7533         | 2.3627          |               |
|           | <b>-3.2520</b>  | <b>0</b> | <b>7.0132</b>  | <b>7.7305</b>   | <b>0.0034</b> |
| Bi(2)O8   | 1.0198          | -1.2673  | -0.0191        | 1.6270          |               |
|           | 1.0198          | 1.2673   | -0.0191        | 1.6270          |               |
|           | 1.0198          | -1.2673  | -0.0191        | 1.6270          |               |
|           | 1.0198          | 1.2673   | -0.0191        | 1.6270          |               |
|           | <b>4.0792</b>   | <b>0</b> | <b>-0.0764</b> | <b>4.0799</b>   | <b>0.0018</b> |
| Unit cell | <b>-45.6660</b> | <b>0</b> | <b>90.2196</b> | <b>101.1185</b> | <b>0.0449</b> |

**Table S5.** Calculation of dipole moment for  $\text{NaM}(\text{IO}_3)_4$  ( $M = \text{Ce}, \text{Sm}, \text{La}, \text{Eu}, \text{Bi}, \text{Y}$ ).

| $\text{NaM}(\text{IO}_3)_4$  | Space group | Ionic Radius ( $M^{3+}$ ) | $\text{MO}_8$ (debye) | Total (debye) | $V/\text{\AA}^3$ | Total ( $\text{D}\cdot\text{\AA}^{-3}$ ) | SHG                            |
|------------------------------|-------------|---------------------------|-----------------------|---------------|------------------|------------------------------------------|--------------------------------|
| $\text{NaCe}(\text{IO}_3)_4$ | <i>Cc</i>   | 1.14                      | 0.85–1.34             | 100.39        | 2318.58          | 0.0433                                   | $50\times\alpha\text{-SiO}_2$  |
| $\text{NaSm}(\text{IO}_3)_4$ | <i>Cc</i>   | 1.27                      | 0.96–1.60             | 99.01         | 2248.44          | 0.0440                                   | $60\times\alpha\text{-SiO}_2$  |
| $\text{NaLa}(\text{IO}_3)_4$ | <i>Cc</i>   | 1.16                      | 1.19–1.75             | 98.38         | 2316.8           | 0.0425                                   | $120\times\alpha\text{-SiO}_2$ |
| $\text{NaEu}(\text{IO}_3)_4$ | <i>Cc</i>   | 1.25                      | 1.11–1.62             | 97.69         | 2231.4           | 0.0438                                   | $130\times\alpha\text{-SiO}_2$ |
| $\text{NaBi}(\text{IO}_3)_4$ | <i>Cc</i>   | 1.17                      | 1.63–2.33             | 101.11        | 2253.2           | 0.0449                                   | $5.0\times\text{KDP}$          |
| $\text{NaY}(\text{IO}_3)_4$  | <i>Cc</i>   | 1.02                      | 0.84–1.61             | 100.46        | 2181.3           | 0.0460                                   | $400\times\alpha\text{-SiO}_2$ |

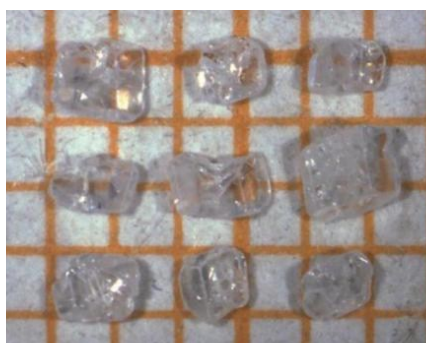

$\text{KBi}(\text{IO}_3)_3(\text{OH})$

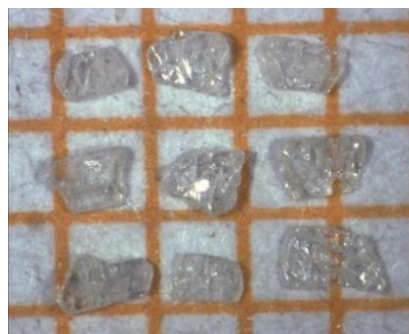

$\text{NaBi}(\text{IO}_3)_4$

**Fig. S1.** Morphology for  $\text{KBi}(\text{IO}_3)_3(\text{OH})$  and  $\text{NaBi}(\text{IO}_3)_4$ .

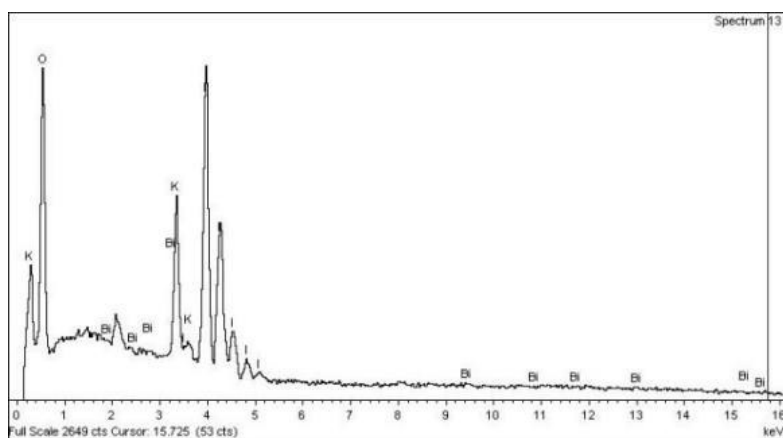

$\text{KBi}(\text{IO}_3)_3(\text{OH})$

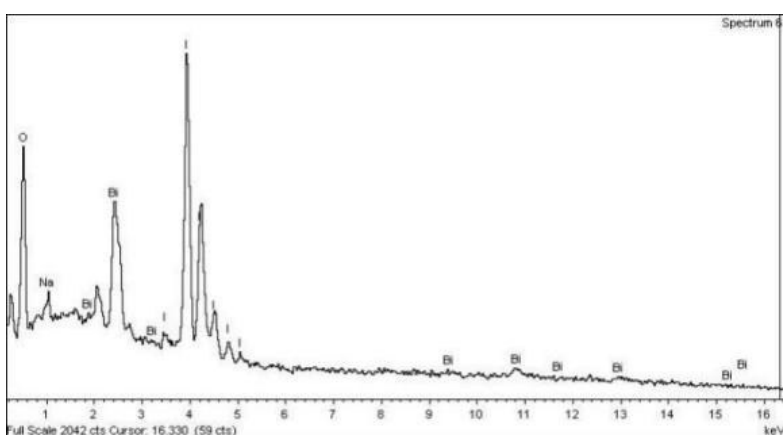

$\text{NaBi}(\text{IO}_3)_4$

**Fig. S2.** Energy-Dispersive Spectrometry (EDS) plot of  $\text{KBi}(\text{IO}_3)_3(\text{OH})$  and  $\text{NaBi}(\text{IO}_3)_4$ .

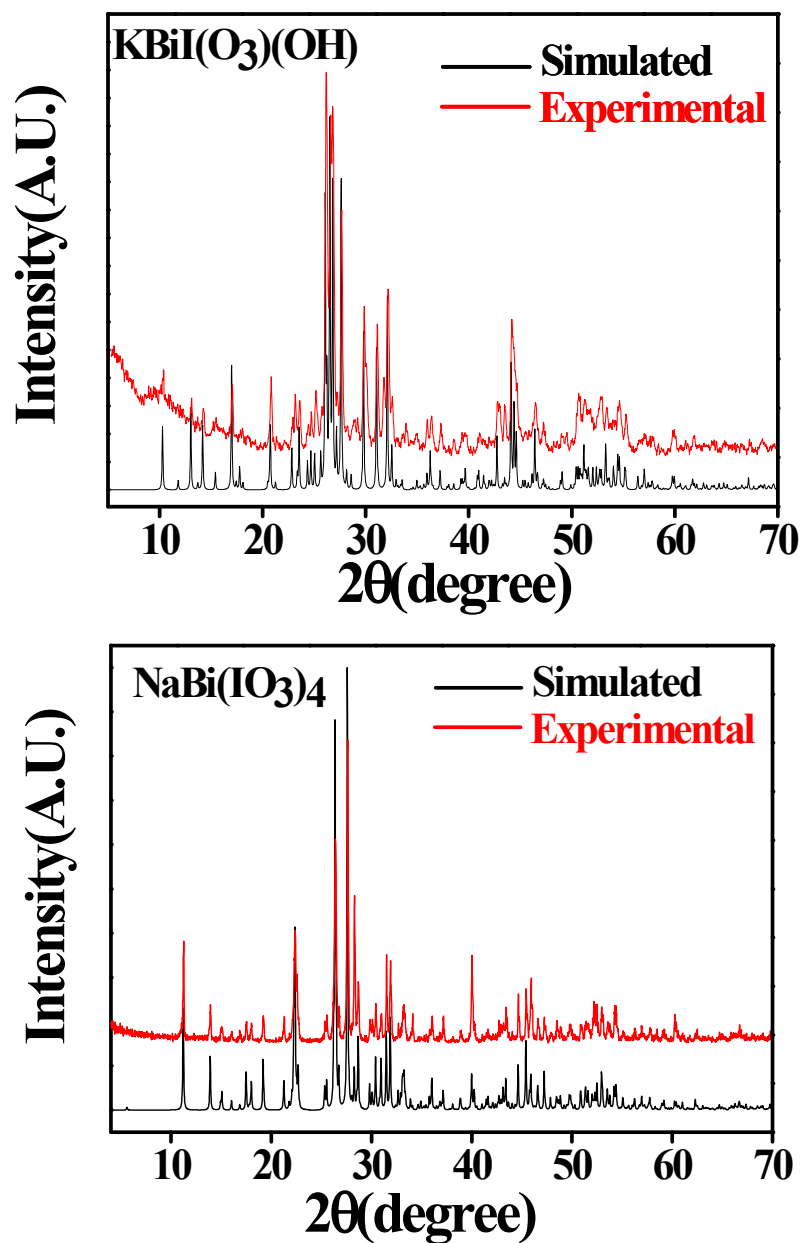

**Fig. S3.** Experimental and simulated PXRD patterns of  $\text{KBi}(\text{IO}_3)_3(\text{OH})$  and  $\text{NaBi}(\text{IO}_3)_4$ .

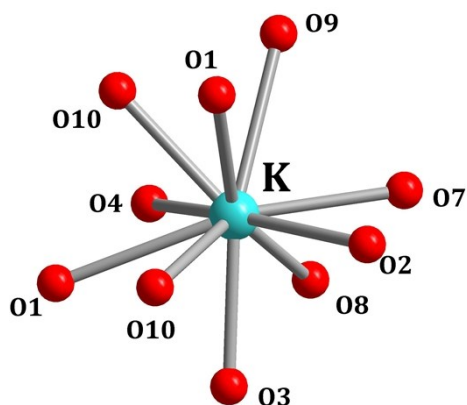

Fig. S4. Coordinate environments of the  $K^+$  in  $KBi(IO_3)_3(OH)$ .

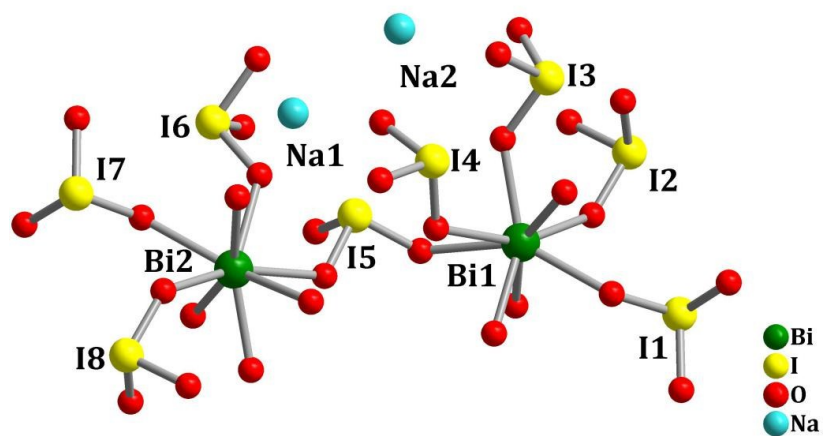

Fig. S5. Asymmetric unit of  $NaBi(IO_3)_4$ .

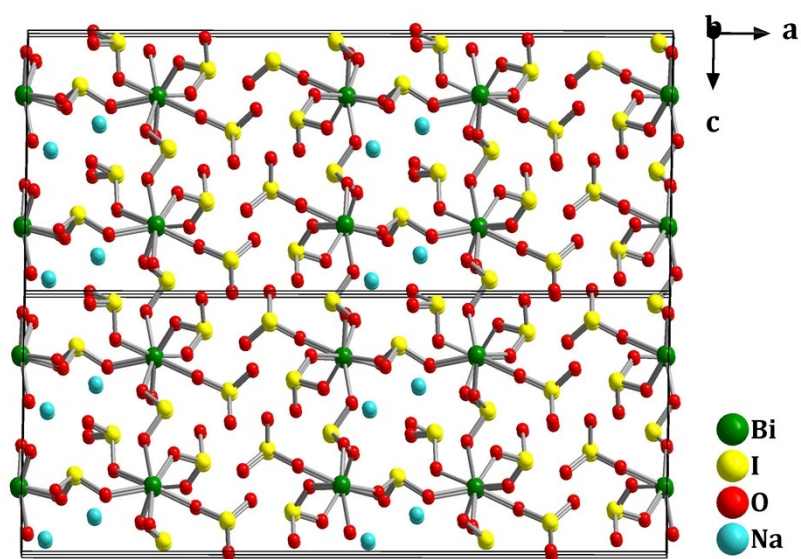

Fig. S6. Structure of  $NaBi(IO_3)_4$  along the  $b$ -axis.



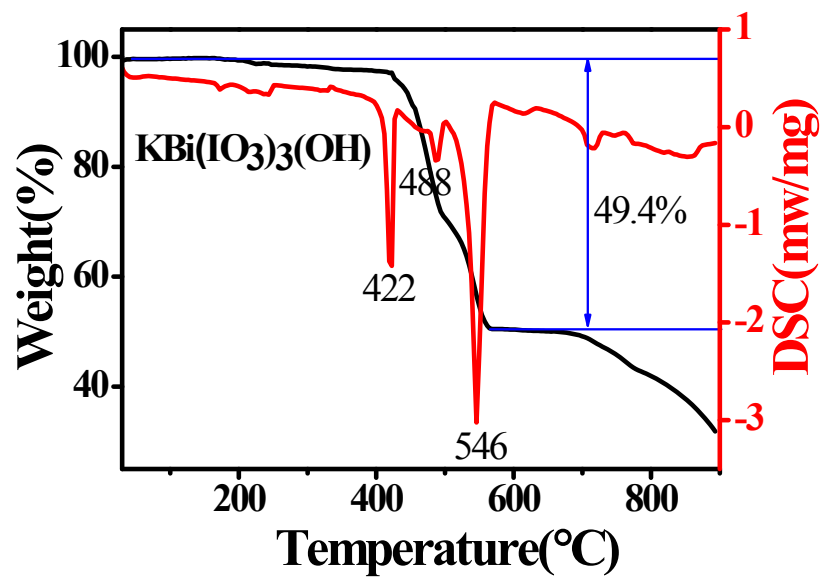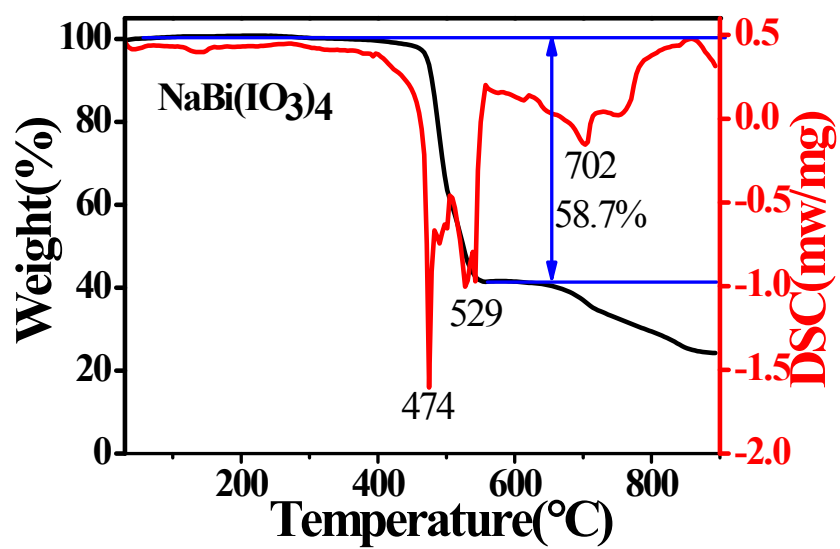

**Fig. S7.** TGA and DSC curves of  $\text{KBi}(\text{IO}_3)_3(\text{OH})$  and  $\text{NaBi}(\text{IO}_3)_4$ .

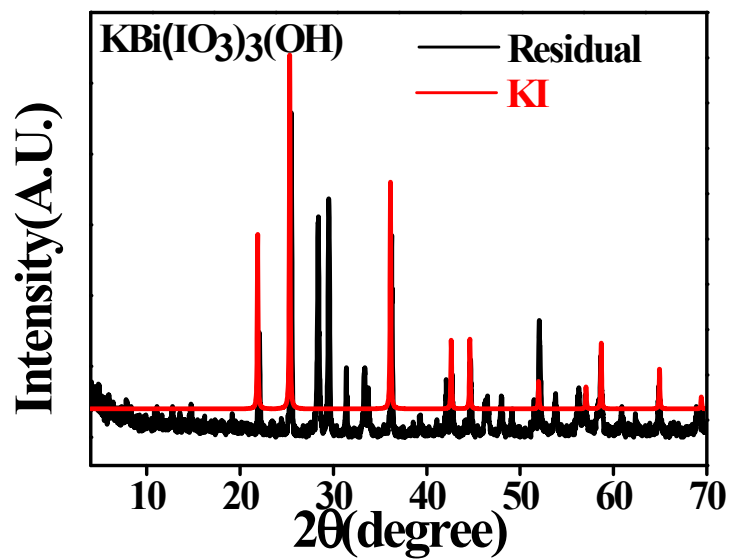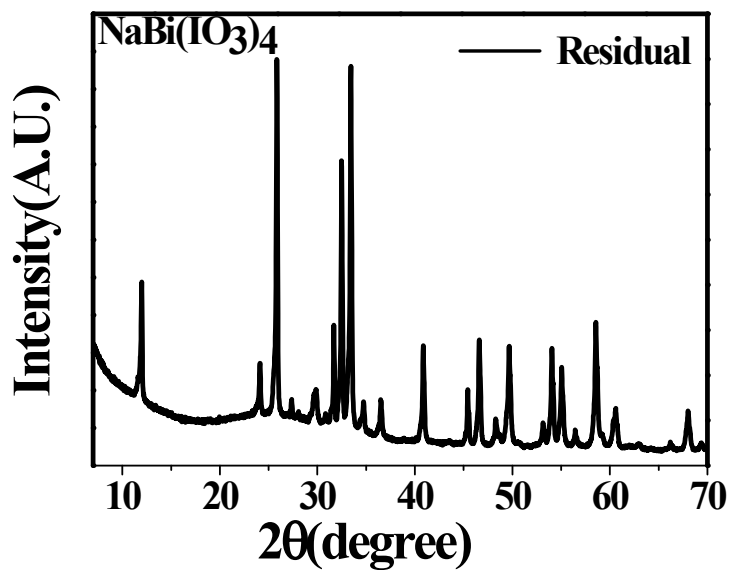

**Fig. S8.** PXRD patterns for the residual of  $\text{KBi}(\text{IO}_3)_3(\text{OH})$  and  $\text{NaBi}(\text{IO}_3)_4$ .

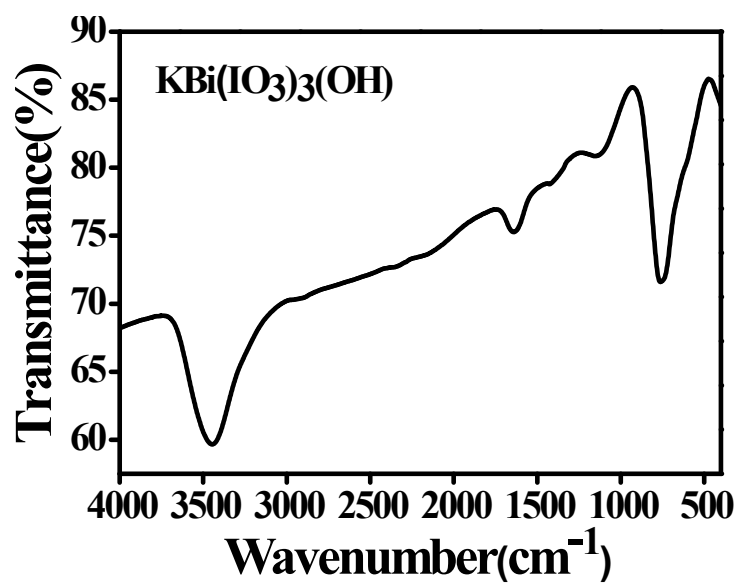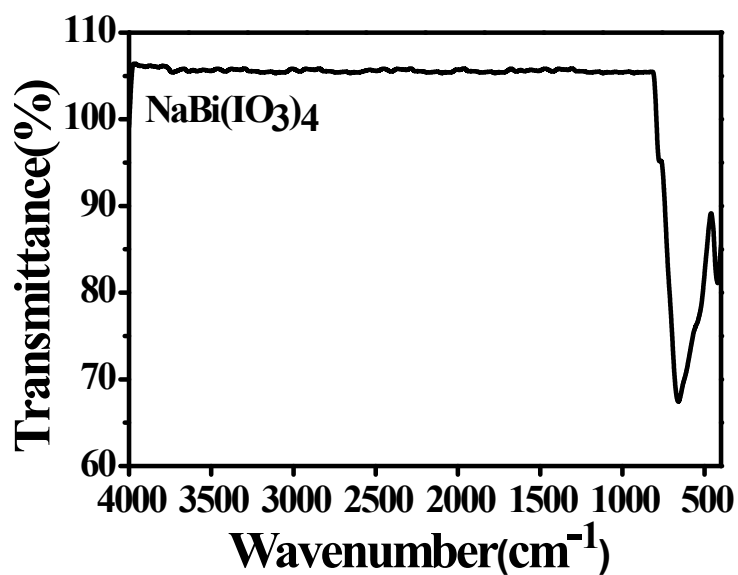

Fig. S9. IR spectrum of  $\text{KBi}(\text{IO}_3)_3(\text{OH})$  and  $\text{NaBi}(\text{IO}_3)_4$ .

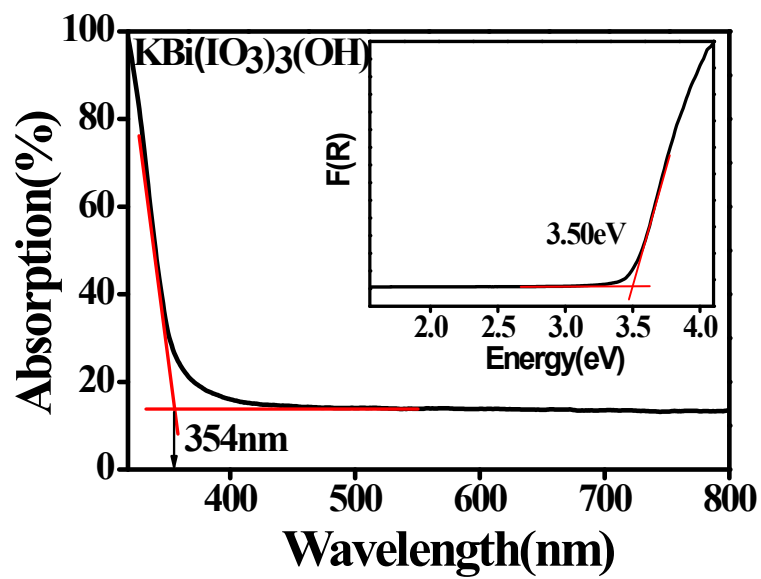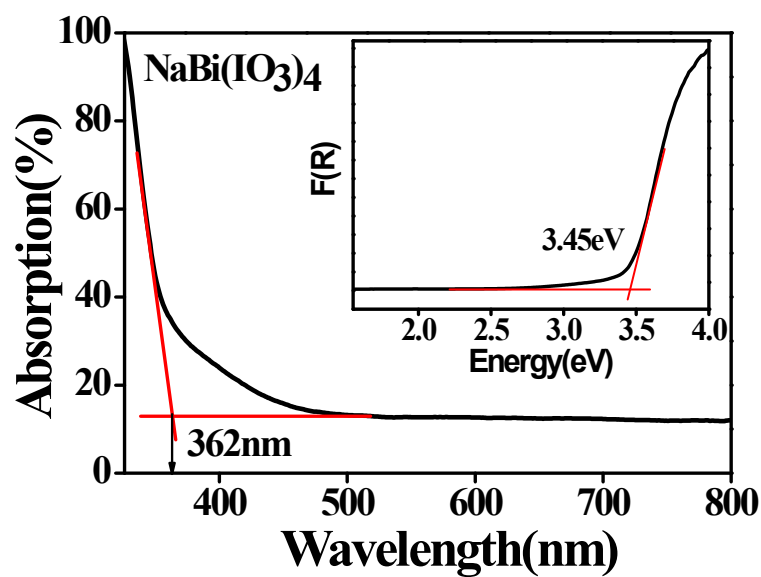

**Fig. S10.** UV-vis diffuse spectra of  $\text{KBi}(\text{IO}_3)_3(\text{OH})$  and  $\text{NaBi}(\text{IO}_3)_4$

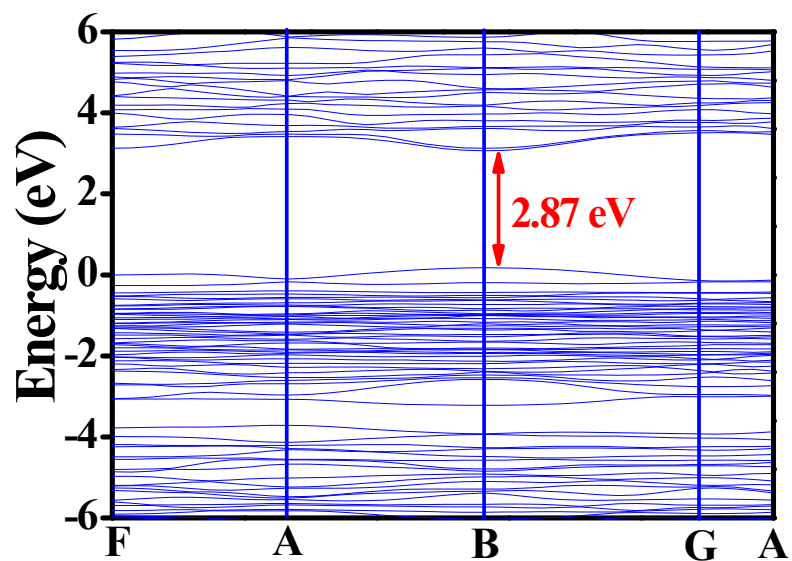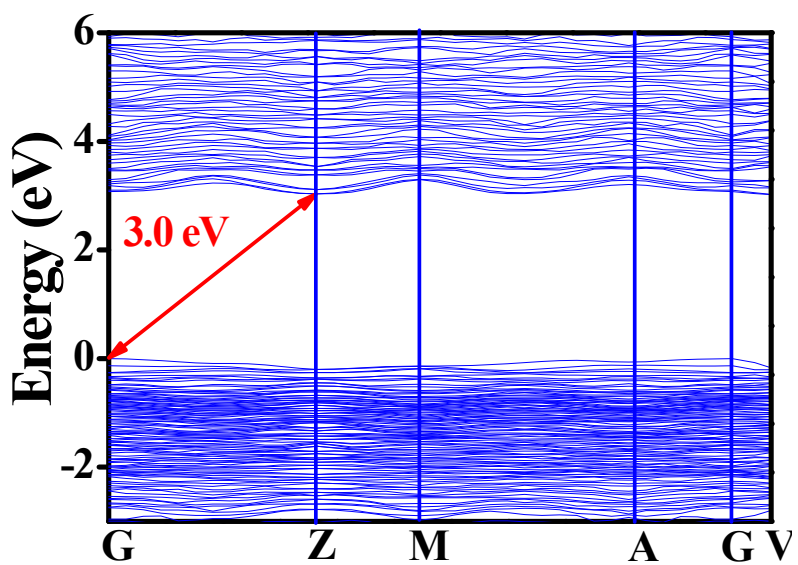

(a)

(b)

**Fig. S11.** Calculated band structures of (a)  $\text{KBi}(\text{IO}_3)_3(\text{OH})$  and (b)  $\text{NaBi}(\text{IO}_3)_4$ .

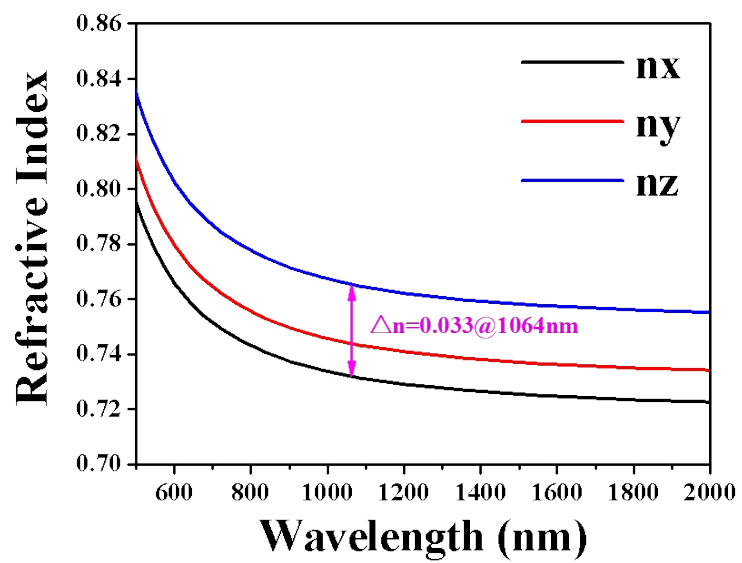

**Fig. S12.** Calculated refractive indices and birefringence of NaBi(IO<sub>3</sub>)<sub>4</sub>.
